# Supplementary material for: A Population Pharmacokinetic Model of Intravenous Dexmedetomidine for Mechanically Ventilated Children after Neurosurgery
Source: PubMed Central journal article supplement (PMC6832515; doi:10.3390/jcm8101563), 2019-10-01
Supplement: jcm-08-01563-s001.pdf [file jcm-08-01563-s001.pdf]

**Table S1** Overview of previously published pharmacokinetic estimates of dexmedetomidine in the pediatric population, standardized for a body weight of 70 kg using the allometric model. Values are median (range) or mean  $\pm$  SD.

| Study            | N  | Age<br>year    | Weight<br>kg     | Dosing regimen                                                                                          | Population      | Model  | Pharmacokinetic parameters |           |            |           |
|------------------|----|----------------|------------------|---------------------------------------------------------------------------------------------------------|-----------------|--------|----------------------------|-----------|------------|-----------|
|                  |    |                |                  |                                                                                                         |                 |        | CL<br>(L/h)                | V1<br>(L) | Q<br>(L/h) | V2<br>(L) |
| This study       | 29 | 7.0 (2.0–12.0) | 22.0 (11.0–58.0) | 0.25, 0.5 $\mu\text{g}/\text{kg}$ for 10 min followed by 0.25, 0.5 $\mu\text{g}/\text{kg}/\text{h}$     | ICU             | 2-comp | 81.0                       | 64.2      | 116.4      | 167.0     |
| Potts (2008)     | 45 | 3.4 (0.0–14))  | 15.1 (3.1–58.9)  | 1–4 $\mu\text{g}/\text{kg}$ for 10 min                                                                  | ICU             | 2-comp | 39.2                       | 36.9      | 69.9       | 68.2      |
| Potts (2009)     | 95 | 3.8 (0.0–14.4) | 16.1 (3.1–58.9)  | 1–6 $\mu\text{g}/\text{kg}$ for 5–10 min or 0.2 $\mu\text{g}/\text{kg}/\text{h}$                        | Pooled analysis | 2-comp | 42.1                       | 56.3      | 78.3       | 69        |
| Wiczling (2016)  | 38 | 5.8 (0.1–15.7) | 18.5 (4.7–60)    | 0.8 $\mu\text{g}/\text{kg}/\text{h}$                                                                    | ICU             | 2-comp | 41.6                       | 56.8      | 52.0       | 70.4      |
| Liu (2017)       | 36 | 3.0 (1–9)      | 14.3 (10.0–27.0) | 1.0, 1.5, 2.0 $\mu\text{g}/\text{kg}$ for 10 min                                                        | Surgery         | 2-comp | 36.2                       | 84.3      | 82.8       | 114.0     |
| Greenberg (2017) | 20 | 0.1 (0.0–0.6)  | 4.0 (2.0–6.0)    | 1 $\mu\text{g}/\text{kg}/\text{h}$ continuous infusion with 0.5 $\mu\text{g}/\text{kg}$ bolus as needed | ICU             | 1-comp | 48.2                       | 106.0     |            |           |
| Pérez-Guillé     | 30 | 11 $\pm$ 5     | 43 $\pm$ 19      | 0.7 $\mu\text{g}/\text{kg}$ for 10–15 min                                                               | Surgery         | 2-comp | 20.8                       | 21.9      | 75.8       | 81.2      |

CL, clearance of central compartment; V1, volume of distribution of central compartment; Q, clearance of peripheral compartment; V2, volume of distribution of peripheral compartment; ICU, intensive care unit.
